# Supplementary material
Source: PubMed Central journal article supplement (PMC2662932)
Supplement: supp_173_3_297__1.pdf [file supp_173_3_297__1.pdf]

## **ONLINE DATA SUPPLEMENT**

### **Association of indoor nitrogen dioxide exposure with respiratory symptoms in asthmatic children**

Kathleen Belanger, Ph.D.,<sup>1</sup> Janneane F. Gent, Ph.D.,<sup>1</sup> Elizabeth W. Triche, Ph.D.,<sup>1</sup>

Michael B. Bracken, Ph.D.,<sup>1</sup> Brian P. Leaderer, Ph.D.<sup>1</sup>

**Table E1.** Unadjusted associations between respiratory symptoms in the month prior to sampling, personal factors, housing characteristics, maintenance medication use and season of nitrogen dioxide sampling.\* (Southern New England, 1998 - 2000)

| Factors                            | N (%)      | Wheeze (%)  | Persistent cough (%) | Shortness of breath (%) | Chest tightness (%) |
|------------------------------------|------------|-------------|----------------------|-------------------------|---------------------|
| All subjects                       | 728        | 28.5        | 34.1                 | 20.6                    | 16.8                |
| Personal factors                   |            |             |                      |                         |                     |
| Gender                             |            |             |                      |                         |                     |
| Male                               | 458 (62.9) | 30.6        | 35.2                 | 21.6                    | 17.2                |
| Female                             | 270 (37.1) | 25.0        | 32.2                 | 19.0                    | 15.9                |
| Age (yrs)                          |            |             |                      |                         |                     |
| < 6                                | 471 (64.7) | 27.1        | 34.3                 | 19.4                    | <b>13.6</b>         |
| ≥ 6                                | 257 (35.3) | 31.1        | 33.8                 | 23.0                    | <b>22.6</b>         |
| Ethnicity                          |            |             |                      |                         |                     |
| White, Asian, other                | 490 (67.3) | 28.7        | 34.8                 | 19.8                    | 15.7                |
| Black                              | 74 (10.2)  | 29.7        | 37.8                 | 25.7                    | 23.0                |
| Hispanic                           | 164 (22.5) | 27.4        | 30.5                 | 20.7                    | 17.1                |
| Housing characteristics            |            |             |                      |                         |                     |
| Housing type                       |            |             |                      |                         |                     |
| Multifamily                        | 242 (33.2) | 27.0        | 32.6                 | 21.6                    | 17.4                |
| Single family                      | 486 (66.7) | 29.3        | 34.8                 | 20.2                    | 16.5                |
| Number of rooms in home            |            |             |                      |                         |                     |
| < 6                                | 288 (39.7) | 29.3        | 34.0                 | 20.9                    | 18.8                |
| ≥ 6                                | 438 (60.3) | 27.9        | 34.1                 | 20.6                    | 15.5                |
| Mold/mildew                        |            |             |                      |                         |                     |
| Yes                                | 310 (42.7) | 28.4        | 32.9                 | 23.6                    | 17.4                |
| No                                 | 416 (57.3) | 28.7        | 34.9                 | 18.6                    | 16.4                |
| Water leaks                        |            |             |                      |                         |                     |
| Yes                                | 239 (32.9) | 32.6        | <b>40.6</b>          | 24.7                    | 19.7                |
| No                                 | 488 (67.1) | 26.5        | <b>30.8</b>          | 18.7                    | 15.4                |
| Maintenance medication use         |            |             |                      |                         |                     |
| Yes                                | 370 (50.8) | <b>37.0</b> | <b>42.0</b>          | <b>27.3</b>             | <b>22.7</b>         |
| No                                 | 358 (49.2) | <b>19.7</b> | <b>26.0</b>          | <b>13.7</b>             | <b>10.6</b>         |
| Season of NO <sub>2</sub> sampling |            |             |                      |                         |                     |
| Nov - Mar                          | 274 (37.6) | <b>35.5</b> | <b>44.2</b>          | <b>27.4</b>             | <b>23.4</b>         |
| Apr - Oct                          | 454 (62.4) | <b>24.3</b> | <b>28.0</b>          | <b>16.6</b>             | <b>12.8</b>         |

\*Significant ( $p < 0.05$ ,  $\chi^2$  test) differences between children with and without symptoms are shown in boldface type.

**Table E2.** Unadjusted associations between household source of NO<sub>2</sub> (gas stoves) and measured NO<sub>2</sub> ≥ 20 ppb (parts per billion), personal factors, housing characteristics, maintenance medication use and season of nitrogen dioxide sampling.\* (Southern New England, 1998 - 2000)

| Factors                            | N (%)      | Gas stove (%) | NO <sub>2</sub> ≥ 20 ppb (%) |
|------------------------------------|------------|---------------|------------------------------|
| All subjects                       | 728        | 33.8          | 21.4                         |
| Personal factors                   |            |               |                              |
| Gender                             |            |               |                              |
| Male                               | 458 (62.9) | 32.2          | 20.5                         |
| Female                             | 270 (37.1) | 31.5          | 23.0                         |
| Age (yrs)                          |            |               |                              |
| < 6                                | 471 (64.7) | 34.2          | 21.9                         |
| ≥ 6                                | 257 (35.3) | 33.1          | 20.6                         |
| Ethnicity                          |            |               |                              |
| White, Asian, other                | 490 (67.3) | <b>25.9</b>   | <b>11.8</b>                  |
| Black                              | 74 (10.2)  | <b>33.2</b>   | <b>29.7</b>                  |
| Hispanic                           | 164 (22.5) | <b>54.9</b>   | <b>46.3</b>                  |
| Housing characteristics            |            |               |                              |
| Housing type                       |            |               |                              |
| Multifamily                        | 242 (33.2) | <b>54.6</b>   | <b>45.9</b>                  |
| Single family                      | 486 (66.7) | <b>23.5</b>   | <b>9.3</b>                   |
| Number of rooms in home            |            |               |                              |
| < 6                                | 288 (39.7) | <b>47.2</b>   | <b>37.8</b>                  |
| ≥ 6                                | 438 (60.3) | <b>25.1</b>   | <b>10.7</b>                  |
| Mold/mildew                        |            |               |                              |
| Yes                                | 310 (42.7) | 30.3          | 19.7                         |
| No                                 | 416 (57.3) | 36.3          | 22.8                         |
| Water leaks                        |            |               |                              |
| Yes                                | 239 (32.9) | 30.1          | 20.9                         |
| No                                 | 488 (67.1) | 35.4          | 21.7                         |
| Maintenance medication use         |            |               |                              |
| Yes                                | 370 (50.8) | 32.7          | <b>16.2</b>                  |
| No                                 | 358 (49.2) | 34.9          | <b>26.8</b>                  |
| Season of NO <sub>2</sub> sampling |            |               |                              |
| Nov - Mar                          | 274 (37.6) | 33.9          | 23.0                         |
| Apr - Oct                          | 454 (62.4) | 33.7          | 20.5                         |

\*Significant ( $p < 0.05$ ,  $\chi^2$  tests) differences between factor categories for gas stove use and NO<sub>2</sub> ≥ 20 ppb shown in boldface type.
